# Supplementary material
Source: PubMed Central journal article supplement (PMC7395786)
Supplement: 41422_2020_356_MOESM1_ESM.pdf [file 41422_2020_356_MOESM1_ESM.pdf]

## Supplementary information, Figure S1

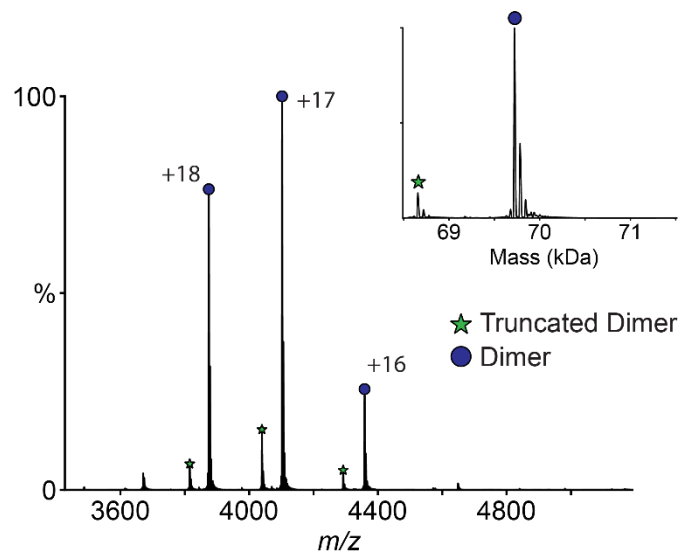

### Supplementary information Fig. 1: Native mass spectrum of SARS-CoV-2 M<sup>pro</sup>.

Native mass spectrum of SARS-CoV-2 M<sup>pro</sup> with 4 mM DTT shows a dimer (*blue circle*) with a small amount of truncated dimer where one subunit has lost the C-terminal His tag (*green star*). The primary charge states are labeled, and the inset shows the deconvoluted zero-charge mass distribution. The deconvoluted mass for the M<sup>pro</sup> dimer is 69,722 Da, which corresponding to the monomer mass of 34,861 Da.
