# Supplementary material
Source: PubMed Central journal article supplement (PMC7395786)
Supplement: 41422_2020_356_MOESM2_ESM.pdf [file 41422_2020_356_MOESM2_ESM.pdf]

## Supplementary information, Figure S2

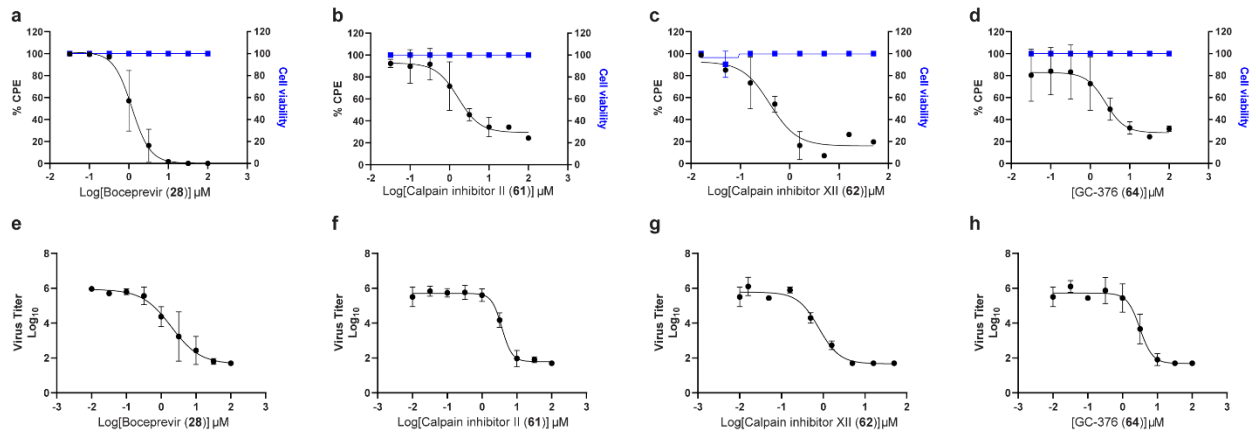

**Supplementary information Fig. 2: Curve fittings for the CPE and VYR assays.**

**a-d** Curve fittings for the CPE assay results for boceprevir (28), calpain inhibitors II (61), XII (62), and GC-376 (64). The cellular cytotoxicity in Vero cells was shown in blue. **e-h** Curve fittings for the VYR assay results for boceprevir (28), calpain inhibitors II (61), XII (62), and GC-376 (64). The values were shown in Table 3.
