# Supplementary material
Source: PubMed Central journal article supplement (PMC7395786)
Supplement: 41422_2020_356_MOESM3_ESM.pdf [file 41422_2020_356_MOESM3_ESM.pdf]

### Supplementary information, Figure S3

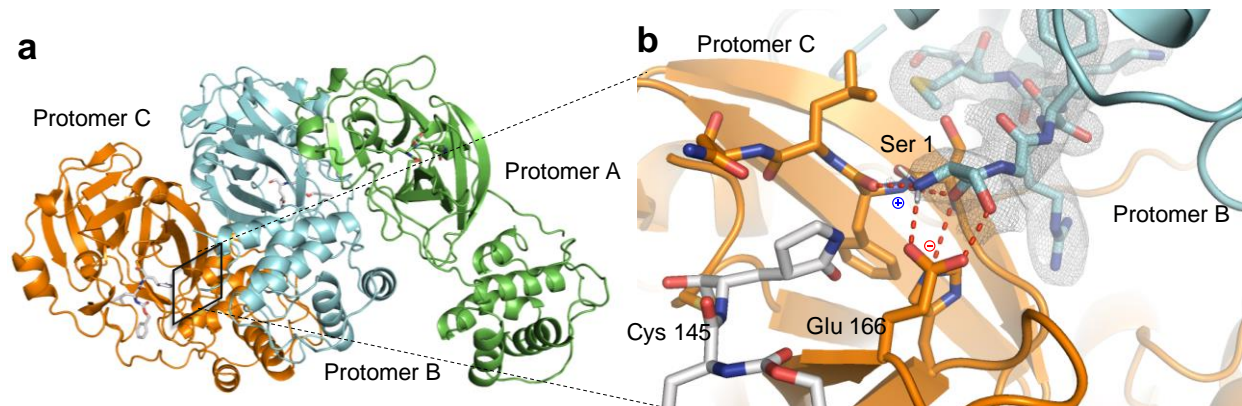

### Supplementary information Fig. 3: Overall structure of SARS-CoV-2 M<sup>pro</sup>.

**a** The three protomers in the asymmetric unit. Protomers B and C form a biological dimer. Protomer A dimerizes with a protomer from an adjacent asymmetric unit (not depicted). **b** The N-finger, or the N-terminal eight residues, shown with the corresponding electron density (2Fo-Fc map contoured at 1  $\sigma$ ), interacts with Glu166 of the adjacent protomer, an important feature for catalytic activity.
