# Supplementary material
Source: PubMed Central journal article supplement (PMC7395786)
Supplement: 41422_2020_356_MOESM4_ESM.pdf [file 41422_2020_356_MOESM4_ESM.pdf]

**Supplementary information, Figure S4**

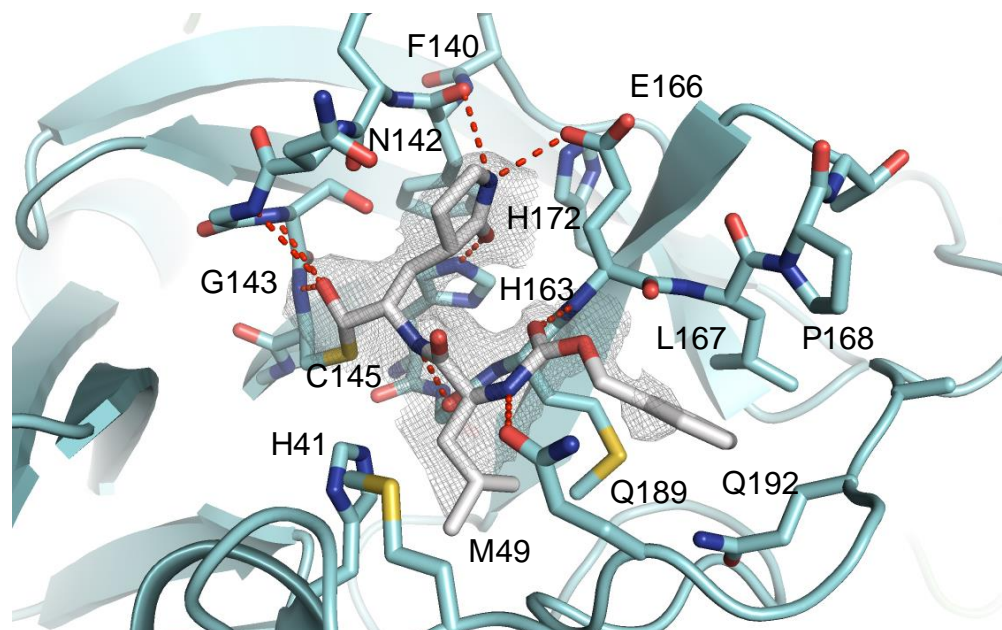

**Supplementary information Fig. 4: Complex structure of SARS-CoV-2 M<sup>pro</sup> protomer B with GC-376 (64).** Unbiased F<sub>o</sub>-F<sub>c</sub> map, shown in grey, is contoured at 2  $\sigma$ . Hydrogen bonds are shown as red dashed lines.
