# Supplementary material
Source: PubMed Central journal article supplement (PMC7395786)
Supplement: 41422_2020_356_MOESM5_ESM.pdf [file 41422_2020_356_MOESM5_ESM.pdf]

## Supplementary information, Figure S5

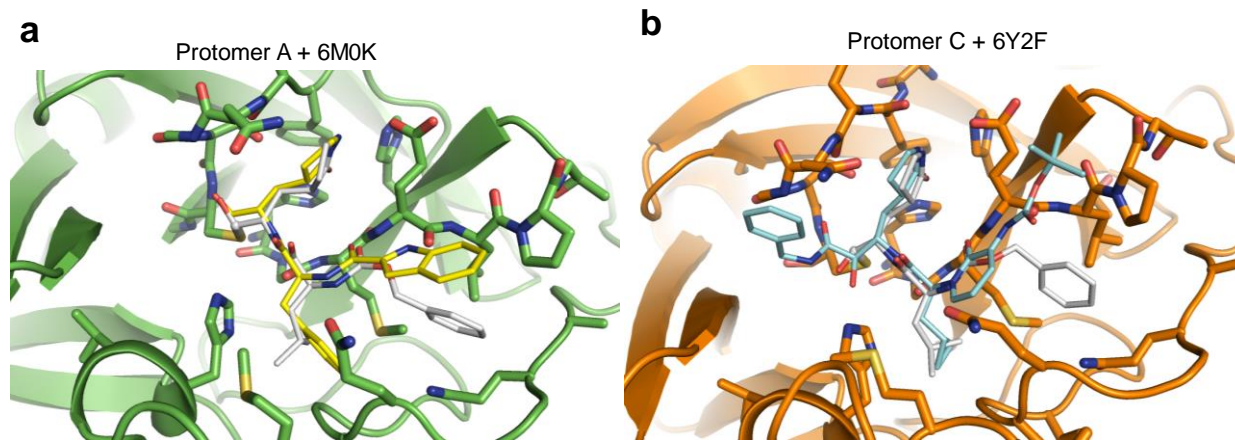

**Supplementary information Fig. 5: Overlay structures of current X-ray crystal structure with previously solved structures. a** Overlay structures of protomer A with compound **11b** at the active site (PDB: 6M0K). **b** Overlay structures of protomer C with compound **13b** at the active site (PDB: 6Y2F). Unbiased  $F_o-F_c$  map, shown in grey, is contoured at  $2\sigma$ . Hydrogen bonds are shown as red dashed lines.
