# Supplementary material
Source: PubMed Central journal article supplement (PMC7395786)
Supplement: 41422_2020_356_MOESM6_ESM.pdf [file 41422_2020_356_MOESM6_ESM.pdf]

**Supplementary information Table S1: Cytotoxicity of SARS-CoV-2 M<sup>pro</sup> inhibitors on various cell lines<sup>a</sup> and the counter screening against influenza virus.**

|                                                                        | GC-376<br>(64) | Boceprevir<br>(28) | MG-132 (43)  | Calpain inhibitor<br>II (61) | Calpain inhibitor XII<br>(62) |
|------------------------------------------------------------------------|----------------|--------------------|--------------|------------------------------|-------------------------------|
| MDCK                                                                   | >100           | >100               | 0.34 ± 0.02  | >100                         | 60.36 ± 2.28                  |
| Vero                                                                   | >100           | >100               | 0.45 ± 0.02  | >100                         | >100                          |
| HCT-8                                                                  | >100           | >100               | 0.47 ± 0.02  | >100                         | 73.29 ± 11.80                 |
| A549                                                                   | >100           | >100               | 10.71 ± 3.50 | >100                         | >100                          |
| Caco-2                                                                 | >100           | >100               | <0.15        | >100                         | 82.02 ± 0.37                  |
| BEAS2B                                                                 | >100           | >100               | 0.14 ± 0.03  | >100                         | 78.91 ± 13.70                 |
| A/California/07/2009<br>(H1N1) antiviral<br>activity <sup>b</sup> (μM) | > 20           | > 20               | N.T.         | > 20                         | > 20                          |

<sup>a</sup>Cytotoxicity was evaluated by measuring CC<sub>50</sub> values (50% cytotoxic concentration) with CPE assay described in the method section. CC<sub>50</sub> = mean ± S.E. of 3 independent experiments. <sup>b</sup>Antiviral activity against influenza virus was tested in plaque assay.
