# Supplementary material
Source: PubMed Central journal article supplement (PMC7395786)
Supplement: 41422_2020_356_MOESM7_ESM.pdf [file 41422_2020_356_MOESM7_ESM.pdf]

**Supplementary information Table S2: Table of Crystallization Statistics**

| <b><u>Data Collection</u></b>        | <b><u>PDB ID 6WTT</u></b>            |
|--------------------------------------|--------------------------------------|
| Structure                            | SARS-CoV-2 M <sup>pro</sup> + GC-376 |
| Space Group                          | P 3 <sub>2</sub> 21                  |
| Cell Dimension                       |                                      |
| a, b, c (Å)                          | 101.82, 101.82, 160.01               |
| α, β, γ (°)                          | 90, 90, 120                          |
|                                      |                                      |
| Resolution (Å)                       | 50.00 - 2.15                         |
|                                      | (2.19 - 2.15)                        |
| R <sub>merge</sub>                   | 0.110 (0.889)                        |
| <I>/σ<I>                             | 28.6 (1.9)                           |
| Completeness (%)                     | 100.0 (99.7)                         |
| Redundancy                           | 9.5 (7.3)                            |
|                                      |                                      |
| <b><u>Refinement</u></b>             |                                      |
|                                      |                                      |
| Resolution (Å)                       | 45.64 - 2.15                         |
|                                      | (2.22 - 2.15)                        |
| No. reflections/free                 | 52574 / 2714                         |
| R <sub>work</sub> /R <sub>free</sub> | 0.22 /0.30                           |
| No. Atoms                            | 7430                                 |
| Protein                              | 6963                                 |
| Ligand/ion                           | 107                                  |
| Water                                | 340                                  |
| B-Factors (Å <sup>2</sup> )          |                                      |
| Protein                              | 66.75                                |
| Ligand/ion                           | 67.17                                |
| Solvent                              | 63.79                                |
| RMS Deviations                       |                                      |
| Bond Lengths (Å)                     | 0.014                                |
| Bond Angles (°)                      | 1.93                                 |
| Ramachandran Favored (%)             | 94.78                                |
| Ramachandran Allowed (%)             | 5.22                                 |
| Ramachandran Outliers (%)            | 0.00                                 |
| Rotameric Outliers (%)               | 2.33                                 |

\* Numbers in parentheses represent the highest resolution shell.
